# Supplementary material for: Resurrection and resilience of the rarest butterflies
Source: PLoS Biol. 2018 Feb 6;16(2):e2003488. doi: 10.1371/journal.pbio.2003488 (PMC5800533; doi:10.1371/journal.pbio.2003488)
Supplement: S1 Data — (XLSX) [file pbio.2003488.s001.xlsx]

## Sheet: Sheet1
Population estimates for St. Francis' Satyr in one population at Ft. Bragg, NC
In 1983, the number is approximate and based on expert opinion
1984-2011, number in one visit to the site each year
2011-16, population estimated from Pollard-Yates surveys
Year	Population size
1983	300	Approximate, not a population estimate as below
1984	NA
1985	NA
1986	NA
1987	NA
1988	NA
1989	NA
1990	NA
1991	NA
1992	NA
1993	NA
1994	NA
1995	NA
1996	NA
1997	NA
1998	NA
1999	NA
2000	NA
2001	NA
2002	3
2003	3
2004	0
2005	0
2006	0
2007	0
2008	1
2009	2
2010	0
2011	0
2012	11
2013	106
2014	175
2015	617
2016	751
